# Supplementary material for: Plants or bacteria? 130 years of mixed imprints in Lake Baldegg sediments (Switzerland), as revealed by compound-specific isotope analysis (CSIA) and biomarker analysis
Source: Copernicus journal article supplement (doi:10.5194/bg-16-2131-2019), 2019-05-22
Supplement: Supplementary file 1 [file bg-16-2131-2019-supplement.pdf]

Supplement of Biogeosciences, 16, 2131–2146, 2019  
<https://doi.org/10.5194/bg-16-2131-2019-supplement>  
© Author(s) 2019. This work is distributed under  
the Creative Commons Attribution 4.0 License.

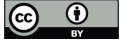

*Supplement of*

**Plants or bacteria? 130 years of mixed imprints in Lake Baldegg sediments (Switzerland), as revealed by compound-specific isotope analysis (CSIA) and biomarker analysis**

**Marlène Lavrieux et al.**

*Correspondence to:* Axel Birkholz ([axel.birkholz@unibas.ch](mailto:axel.birkholz@unibas.ch))

The copyright of individual parts of the supplement might differ from the CC BY 4.0 License.

**Table S1: Soil samples names, land-use and FA  $\delta^{13}\text{C}$  [‰] results. stdev: standard deviation of triplicate measurements.**

| Soil sample name | Land-use            | C24:0 mean $\delta^{13}\text{C}$ [‰] | Stdev. | C26:0 mean $\delta^{13}\text{C}$ [‰] | Stdev. | C28:0 mean $\delta^{13}\text{C}$ [‰] | Stdev. |
|------------------|---------------------|--------------------------------------|--------|--------------------------------------|--------|--------------------------------------|--------|
| Aa               | Arable land         | -34.24                               | 0.28   | -34.73                               | 0.02   | -35.85                               | 0.38   |
| Ab               | Arable land         | -32.83                               | 0.10   | -34.30                               | 0.23   | -35.33                               | 0.29   |
| Ac               | Arable land         | -32.25                               | 0.37   | -34.22                               | 0.46   | -35.37                               | 0.49   |
| Ad               | Arable land         | -31.50                               | 0.21   | -33.85                               | 0.08   | -35.23                               | 0.12   |
| Fa               | Forest (mixed)      | -32.59                               | 0.19   | -34.26                               | 0.19   | -35.32                               | 0.09   |
| Fb               | Forest (mixed)      | -34.00                               | 0.41   | -34.45                               | 0.31   | -34.10                               | 0.49   |
| Fc               | Forest (mixed)      | -32.58                               | 0.14   | -33.43                               | 0.04   | -34.42                               | 0.17   |
| Fd               | Forest (mixed)      | -32.51                               | 0.08   | -33.10                               | 0.36   | -33.89                               | 0.50   |
| Fe               | Forest (mixed)      | -33.10                               | 0.10   | -33.87                               | 0.06   | -34.63                               | 0.11   |
| Oa               | Orchard             | -32.84                               | 0.41   | -34.14                               | 0.15   | -35.05                               | 0.29   |
| Ob               | Orchard             | -33.24                               | 0.18   | -34.43                               | 0.12   | -35.01                               | 0.09   |
| Oc               | Orchard             | -33.21                               | 0.47   | -34.55                               | 0.35   | -35.29                               | 0.15   |
| Od               | Orchard             | -32.43                               | 0.47   | -33.29                               | 0.26   | -34.52                               | 0.29   |
| Oe               | Orchard             | -33.51                               | 0.16   | -34.83                               | 0.15   | -35.16                               | 0.33   |
| PGa              | Permanent grassland | -35.00                               | 0.31   | -35.71                               | 0.29   | -37.10                               | 0.18   |
| PGb              | Permanent grassland | -34.51                               | 0.49   | -35.56                               | 0.48   | -36.15                               | 0.17   |
| PGc              | Permanent grassland | -34.11                               | 0.41   | -35.23                               | 0.16   | -36.32                               | 0.25   |
| TGa              | Temporary grassland | -34.34                               | 0.18   | -35.58                               | 0.12   | -36.73                               | 0.27   |
| TGb              | Temporary grassland | -33.74                               | 0.14   | -35.06                               | 0.21   | -36.64                               | 0.15   |
| TGc              | Temporary grassland | -34.83                               | 0.16   | -35.68                               | 0.30   | -36.33                               | 0.45   |
| TGd              | Temporary grassland | -33.23                               | 0.26   | -34.90                               | 0.37   | -36.30                               | 0.31   |

**Table S2: Lake sediment core samples depth, age, and FA  $\delta^{13}\text{C}$  [‰] results. stdev: standard deviation of triplicate measurements.**

| Depth (mm) | Age CE           | C24:0 mean $\delta^{13}\text{C}$ [‰] | Stdev. | C26:0 mean $\delta^{13}\text{C}$ [‰] | Stdev. | C28:0 mean $\delta^{13}\text{C}$ [‰] | Stdev. |
|------------|------------------|--------------------------------------|--------|--------------------------------------|--------|--------------------------------------|--------|
| 000-009    | Post-1995        | -36.27                               | 0.38   | -34.39                               | 0.22   | -34.75                               | 0.08   |
| 018-027    | Post-1995        | -35.20                               | 0.29   | -34.20                               | 0.29   | -34.66                               | 0.30   |
| 042-052    | 1989-1992        | -33.90                               | 0.49   | -33.53                               | 0.45   | -34.83                               | 0.39   |
| 061-077    | 1982-1985        | -36.01                               | 0.23   | -34.65                               | 0.50   | -34.63                               | 0.26   |
| 092-100    | 1976-1978        | -37.74                               | 0.50   | -34.25                               | 0.22   | -34.36                               | 0.38   |
| 111-128    | 1970-1972        | -33.68                               | 0.44   | -33.69                               | 0.32   | -36.11                               | 0.35   |
| 142-157    | 1964-1966        | -33.34                               | 0.34   | -33.59                               | 0.28   | -37.81                               | 0.12   |
| 164-173    | 1957-1960        | -32.94                               | 0.20   | -33.76                               | 0.28   | -34.11                               | 0.48   |
| 175-184    | 1956 (Turbidite) | -33.34                               | 0.18   | -33.14                               | 0.42   | -32.92                               | 0.25   |
| 193-204    | 1950-1952        | -36.71                               | 0.50   | -33.95                               | 0.33   | -34.34                               | 0.16   |
| 211-225    | 1944-1946        | -36.26                               | 0.46   | -33.96                               | 0.29   | -34.04                               | 0.13   |
| 234-245    | 1938-1940        | -37.83                               | 0.50   | -35.61                               | 0.39   | -35.86                               | 0.14   |
| 259-270    | 1932-1934        | -39.03                               | 0.49   | -36.05                               | 0.44   | -35.63                               | 0.38   |
| 283-295    | 1926-1928        | -38.94                               | 0.45   | -37.50                               | 0.34   | -35.91                               | 0.13   |
| 305-315    | 1920-1922        | -38.70                               | 0.42   | -35.64                               | 0.14   | -35.06                               | 0.16   |
| 325-333    | 1914-1916        | -40.10                               | 0.48   | -36.58                               | 0.25   | -36.34                               | 0.42   |
| 345-353    | 1908-1910        | -39.13                               | 0.37   | -37.76                               | 0.23   | -36.02                               | 0.12   |
| 363-370    | 1902-1904        | -36.05                               | 0.28   | -37.27                               | 0.33   | -35.83                               | 0.47   |
| 381-389    | 1896-1898        | -35.65                               | 0.33   | -35.77                               | 0.16   | -33.63                               | 0.50   |
| 399-406    | 1890-1892        | -35.16                               | 0.40   | -35.00                               | 0.37   | -33.55                               | 0.28   |
| 415-418    | 1885-1886        | -36.25                               | 0.23   | -35.85                               | 0.39   | -34.70                               | 0.27   |
| 440-453    | Pre-1885         | -35.30                               | 0.44   | -35.23                               | 0.19   | -34.07                               | 0.33   |

**Table S3: Orchard composition and age, defined from aerial pictures.**

| <b>Orchard name</b> | <b>Type of tree</b> | <b>Plot used as orchard since...</b> |
|---------------------|---------------------|--------------------------------------|
| Oa                  | Pear trees          | Less than 10 years                   |
| Ob                  | Vines               | 25 years                             |
| Oc                  | Apple trees         | 20 years                             |
| Od                  | Apple trees         | 20 years                             |
| Oe                  | Apple trees         | 40 years                             |

5

10

15

20

**Table S4: “Suess effect” corrected (back to 1840, pre-industrial era) CSIA  $\delta^{13}\text{C}$  values, after Verburg (2007), for long-chain FAs of Lake Baldegg soil samples. CSIA results are mean values of at least triplicate analyses. T is the assumed turnover time of the FAs in the soil.**

| Soil samples | land use      | C24:0 FA                  | Correction for Suess effect (1840) |         |         | C26:0 FA                  | Correction for Suess effect (1840) |         |         | C28:0 FA                  | Correction for Suess effect (1840) |         |         |
|--------------|---------------|---------------------------|------------------------------------|---------|---------|---------------------------|------------------------------------|---------|---------|---------------------------|------------------------------------|---------|---------|
|              |               | $\delta^{13}\text{C}$ [‰] | T = 100y                           | T = 30y | T = 10y | $\delta^{13}\text{C}$ [‰] | T = 100y                           | T = 30y | T = 10y | $\delta^{13}\text{C}$ [‰] | T = 100y                           | T = 30y | T = 10y |
| A1a          | arable land   | -34.24                    | -33.58                             | -32.92  | -32.41  | -34.73                    | -34.08                             | -33.42  | -32.91  | -35.85                    | -35.19                             | -34.54  | -34.02  |
| A2a          | arable land   | -32.83                    | -32.17                             | -31.52  | -31.00  | -34.30                    | -33.64                             | -32.98  | -32.47  | -35.33                    | -34.68                             | -34.02  | -33.51  |
| A3a          | arable land   | -32.25                    | -31.59                             | -30.93  | -30.42  | -34.22                    | -33.56                             | -32.91  | -32.39  | -35.37                    | -34.72                             | -34.06  | -33.55  |
| A4a          | arable land   | -31.50                    | -30.85                             | -30.19  | -29.68  | -33.85                    | -33.19                             | -32.54  | -32.02  | -35.23                    | -34.57                             | -33.92  | -33.40  |
| F1a          | forest        | -32.59                    | -31.94                             | -31.28  | -30.77  | -34.26                    | -33.61                             | -32.95  | -32.44  | -35.32                    | -34.66                             | -34.01  | -33.49  |
| F2a          | forest        | -34.00                    | -33.34                             | -32.68  | -32.17  | -34.45                    | -33.80                             | -33.14  | -32.63  | -34.10                    | -33.44                             | -32.78  | -32.27  |
| F3a          | forest        | -32.58                    | -31.92                             | -31.27  | -30.75  | -33.43                    | -32.77                             | -32.11  | -31.60  | -34.42                    | -33.77                             | -33.11  | -32.60  |
| F5a          | forest        | -32.51                    | -31.86                             | -31.20  | -30.69  | -33.10                    | -32.45                             | -31.79  | -31.28  | -33.89                    | -33.23                             | -32.58  | -32.06  |
| F8a          | forest        | -33.10                    | -32.45                             | -31.79  | -31.28  | -33.87                    | -33.22                             | -32.56  | -32.05  | -34.63                    | -33.98                             | -33.32  | -32.81  |
| O2a          | orchards      | -32.84                    | -32.18                             | -31.52  | -31.01  | -34.14                    | -33.48                             | -32.83  | -32.31  | -35.05                    | -34.39                             | -33.74  | -33.22  |
| O3a          | orchards      | -33.24                    | -32.59                             | -31.93  | -31.42  | -34.43                    | -33.78                             | -33.12  | -32.61  | -35.01                    | -34.36                             | -33.70  | -33.19  |
| O4a          | orchards      | -33.21                    | -32.56                             | -31.90  | -31.39  | -34.55                    | -33.89                             | -33.24  | -32.72  | -35.29                    | -34.64                             | -33.98  | -33.47  |
| O4'a         | orchards      | -32.43                    | -31.78                             | -31.12  | -30.61  | -33.29                    | -32.64                             | -31.98  | -31.47  | -34.52                    | -33.86                             | -33.20  | -32.69  |
| O5a          | orchards      | -33.51                    | -32.86                             | -32.20  | -31.69  | -34.83                    | -34.18                             | -33.52  | -33.01  | -35.16                    | -34.51                             | -33.85  | -33.34  |
| PG1a         | perm. grassl. | -35.00                    | -34.35                             | -33.69  | -33.18  | -35.71                    | -35.06                             | -34.40  | -33.89  | -37.10                    | -36.45                             | -35.79  | -35.28  |
| PG3a         | perm. grassl. | -34.51                    | -33.85                             | -33.20  | -32.68  | -35.56                    | -34.91                             | -34.25  | -33.74  | -36.15                    | -35.49                             | -34.83  | -34.32  |
| PG2a (Ar2)   | perm. grassl. | -34.11                    | -33.46                             | -32.80  | -32.29  | -35.23                    | -34.58                             | -33.92  | -33.41  | -36.32                    | -35.67                             | -35.01  | -34.50  |
| TG2a         | temp grassl.  | -34.34                    | -33.69                             | -33.03  | -32.52  | -35.58                    | -34.92                             | -34.26  | -33.75  | -36.73                    | -36.08                             | -35.42  | -34.91  |
| TG3a         | temp grassl.  | -33.74                    | -33.09                             | -32.43  | -31.92  | -35.06                    | -34.41                             | -33.75  | -33.24  | -36.64                    | -35.98                             | -35.33  | -34.81  |
| TG4a         | temp grassl.  | -34.83                    | -34.18                             | -33.52  | -33.01  | -35.68                    | -35.03                             | -34.37  | -33.86  | -36.33                    | -35.68                             | -35.02  | -34.51  |
| TG5a         | temp grassl.  | -33.23                    | -32.58                             | -31.92  | -31.41  | -34.90                    | -34.25                             | -33.59  | -33.08  | -36.30                    | -35.65                             | -34.99  | -34.48  |

**Table S5: “Suess effect” corrected (back to 1840, pre-industrial era) CSIA  $\delta^{13}\text{C}$  values, after Verburg (2007), for long-chain FAs of Lake Baldegg lake sediment samples. CSIA results are mean values of at least triplicate analyses. T is the assumed turnover time of the FAs in the soil.**

| Lake sediments | Sediment | C24:0 FA | Correction for Suess effect (1840) |        |                           | C26:0 FA | Correction for Suess effect (1840) |         |         | C28:0 FA | Correction for Suess effect (1840) |          |         |
|----------------|----------|----------|------------------------------------|--------|---------------------------|----------|------------------------------------|---------|---------|----------|------------------------------------|----------|---------|
|                |          |          | Depth (mm)                         | age CE | $\delta^{13}\text{C}$ [‰] |          | T = 100y                           | T = 30y | T = 10y |          | $\delta^{13}\text{C}$ [‰]          | T = 100y | T = 30y |
| 000-009        | 2010     | -36.27   | -35.70                             | -35.11 | -34.65                    | -34.39   | -33.81                             | -33.22  | -32.76  | -34.75   | -34.17                             | -33.58   | -33.12  |
| 018-027        | 2000     | -35.20   | -34.75                             | -34.28 | -33.91                    | -34.20   | -33.75                             | -33.28  | -32.91  | -34.66   | -34.21                             | -33.74   | -33.38  |
| 042-052        | 1990     | -33.90   | -33.55                             | -33.18 | -32.89                    | -33.53   | -33.17                             | -32.81  | -32.52  | -34.83   | -34.48                             | -34.12   | -33.83  |
| 061-077        | 1983     | -36.01   | -35.72                             | -35.41 | -35.16                    | -34.65   | -34.36                             | -34.05  | -33.80  | -34.63   | -34.34                             | -34.04   | -33.79  |
| 092-100        | 1977     | -37.74   | -37.49                             | -37.23 | -37.02                    | -34.25   | -34.00                             | -33.74  | -33.53  | -34.36   | -34.11                             | -33.84   | -33.63  |
| 111-128        | 1971     | -33.68   | -33.46                             | -33.24 | -33.05                    | -33.69   | -33.48                             | -33.25  | -33.07  | -36.11   | -35.90                             | -35.67   | -35.49  |
| 142-157        | 1965     | -33.34   | -33.15                             | -32.96 | -32.80                    | -33.59   | -33.41                             | -33.21  | -33.06  | -37.81   | -37.63                             | -37.44   | -37.28  |
| 164-173        | 1958     | -32.94   | -32.78                             | -32.62 | -32.49                    | -33.76   | -33.61                             | -33.45  | -33.32  | -34.11   | -33.96                             | -33.80   | -33.67  |
| 175-184        | 1956     | -33.34   | -33.20                             | -33.05 | -32.92                    | -33.14   | -32.99                             | -32.84  | -32.72  | -32.92   | -32.78                             | -32.63   | -32.50  |
| 193-204        | 1951     | -36.71   | -36.59                             | -36.45 | -36.34                    | -33.95   | -33.82                             | -33.69  | -33.58  | -34.34   | -34.21                             | -34.08   | -33.97  |
| 211-225        | 1945     | -36.26   | -36.15                             | -36.04 | -35.94                    | -33.96   | -33.86                             | -33.74  | -33.65  | -34.04   | -33.94                             | -33.82   | -33.73  |
| 234-245        | 1939     | -37.83   | -37.74                             | -37.64 | -37.56                    | -35.61   | -35.52                             | -35.42  | -35.34  | -35.86   | -35.77                             | -35.67   | -35.59  |
| 259-270        | 1933     | -39.03   | -38.95                             | -38.87 | -38.80                    | -36.05   | -35.98                             | -35.89  | -35.82  | -35.63   | -35.55                             | -35.47   | -35.40  |
| 283-295        | 1927     | -38.94   | -38.88                             | -38.80 | -38.75                    | -37.50   | -37.44                             | -37.36  | -37.30  | -35.91   | -35.85                             | -35.77   | -35.71  |
| 305-315        | 1921     | -38.70   | -38.65                             | -38.59 | -38.53                    | -35.64   | -35.59                             | -35.53  | -35.48  | -35.06   | -35.00                             | -34.94   | -34.89  |
| 325-333        | 1915     | -40.10   | -40.06                             | -40.00 | -39.96                    | -36.58   | -36.53                             | -36.48  | -36.43  | -36.34   | -36.29                             | -36.24   | -36.19  |
| 345-353        | 1909     | -39.13   | -39.09                             | -39.04 | -39.00                    | -37.76   | -37.72                             | -37.67  | -37.63  | -36.02   | -35.98                             | -35.93   | -35.89  |
| 363-370        | 1903     | -36.05   | -36.02                             | -35.97 | -35.94                    | -37.27   | -37.24                             | -37.19  | -37.16  | -35.83   | -35.80                             | -35.76   | -35.72  |
| 381-389        | 1899     | -35.65   | -35.62                             | -35.58 | -35.55                    | -35.77   | -35.75                             | -35.71  | -35.68  | -33.63   | -33.61                             | -33.57   | -33.54  |
| 399-406        | 1891     | -35.16   | -35.14                             | -35.11 | -35.08                    | -35.00   | -34.98                             | -34.95  | -34.92  | -33.55   | -33.53                             | -33.50   | -33.47  |
| 415-418        | 1885     | -36.25   | -36.24                             | -36.21 | -36.19                    | -35.85   | -35.83                             | -35.81  | -35.78  | -34.70   | -34.69                             | -34.66   | -34.64  |
| 440-453        | 1880     | -35.30   | -35.28                             | -35.26 | -35.24                    | -35.23   | -35.22                             | -35.20  | -35.18  | -34.07   | -34.06                             | -34.04   | -34.01  |

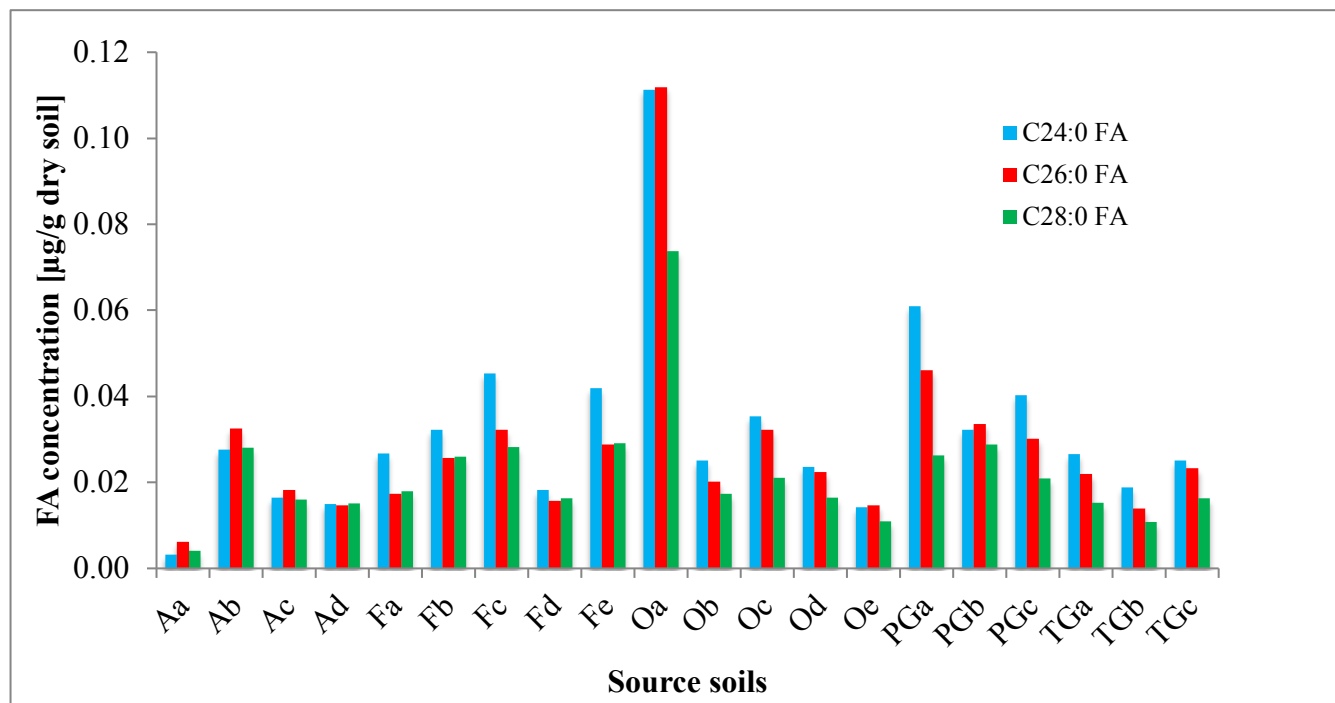

5 Fig.S1: FAs concentration for C24:0, C26:0 and C28:0 in source soils.

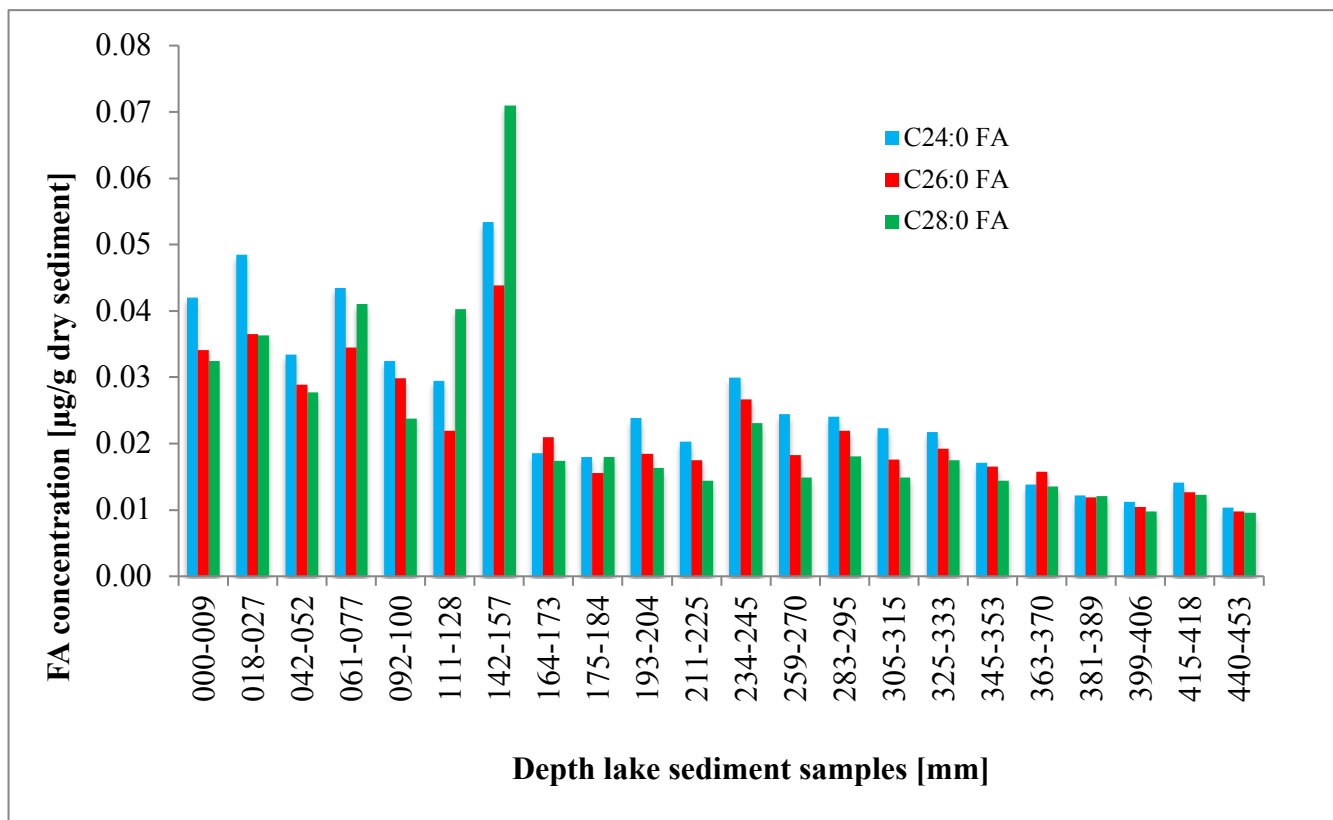

Fig. S2: Lake sediment FAs concentrations for C24:0, C26:0 and C28:0. No obvious enrichment of C24:0 and C26:0 compared to C28:0 and compared to soil FAs concentrations.



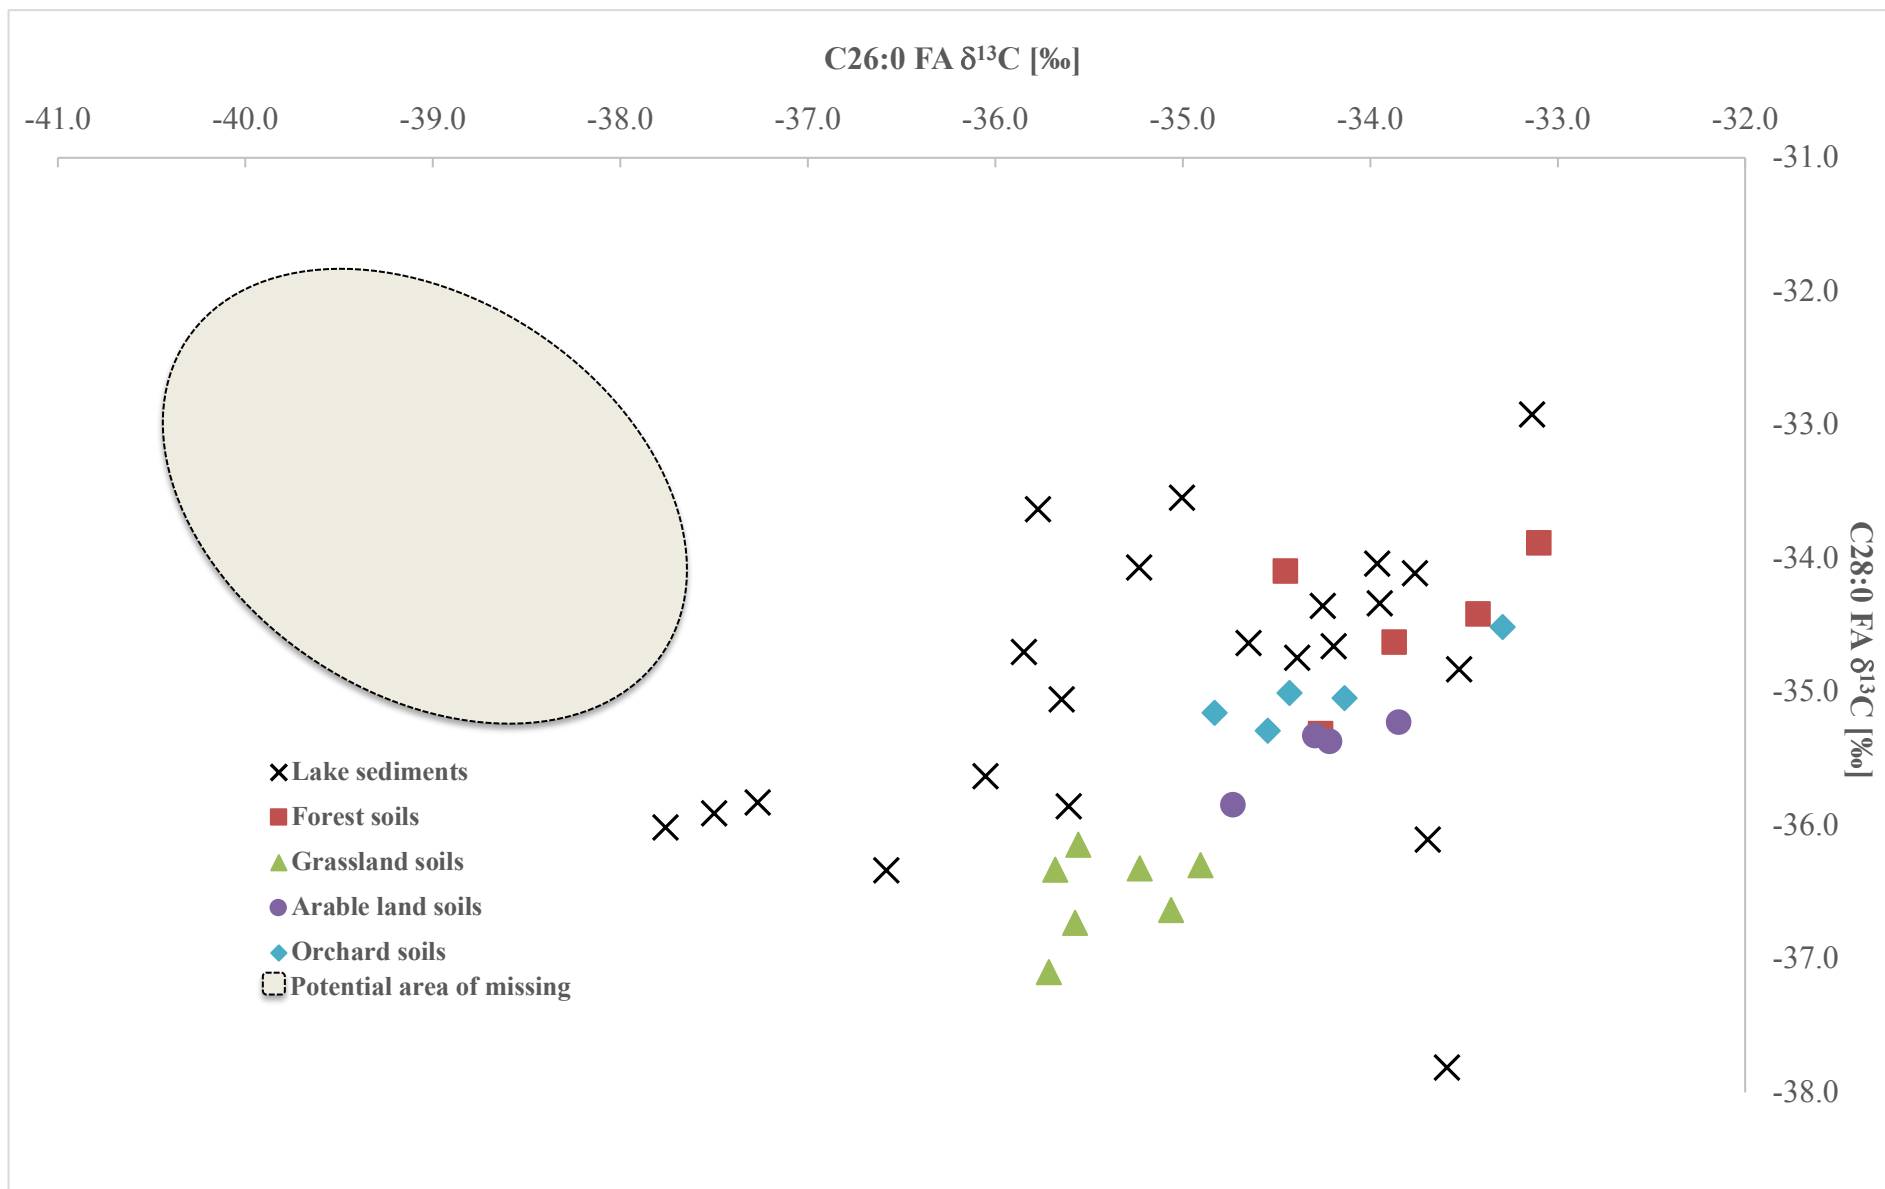

Fig. S3: The grey area,  $\delta^{13}\text{C}$  of C26:0 and C28:0 FA, marks possible margins of the “missing source”.

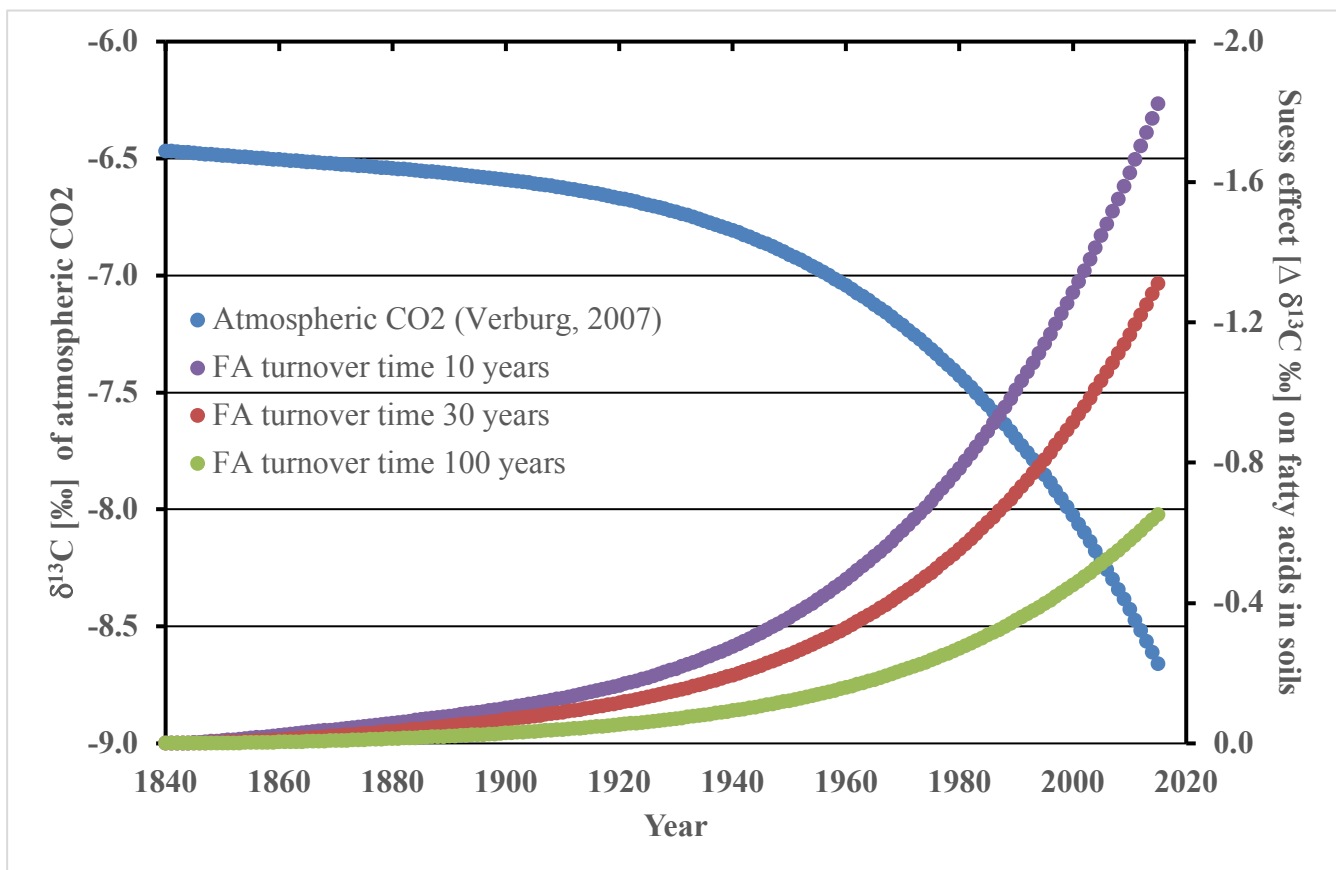

Fig. S4: Actual effect of the atmospheric “Suess effect” (Verburg, 2007) on the FAs in soils, assuming three different turnover times, 10, 30 and 100 years (Equation 1).

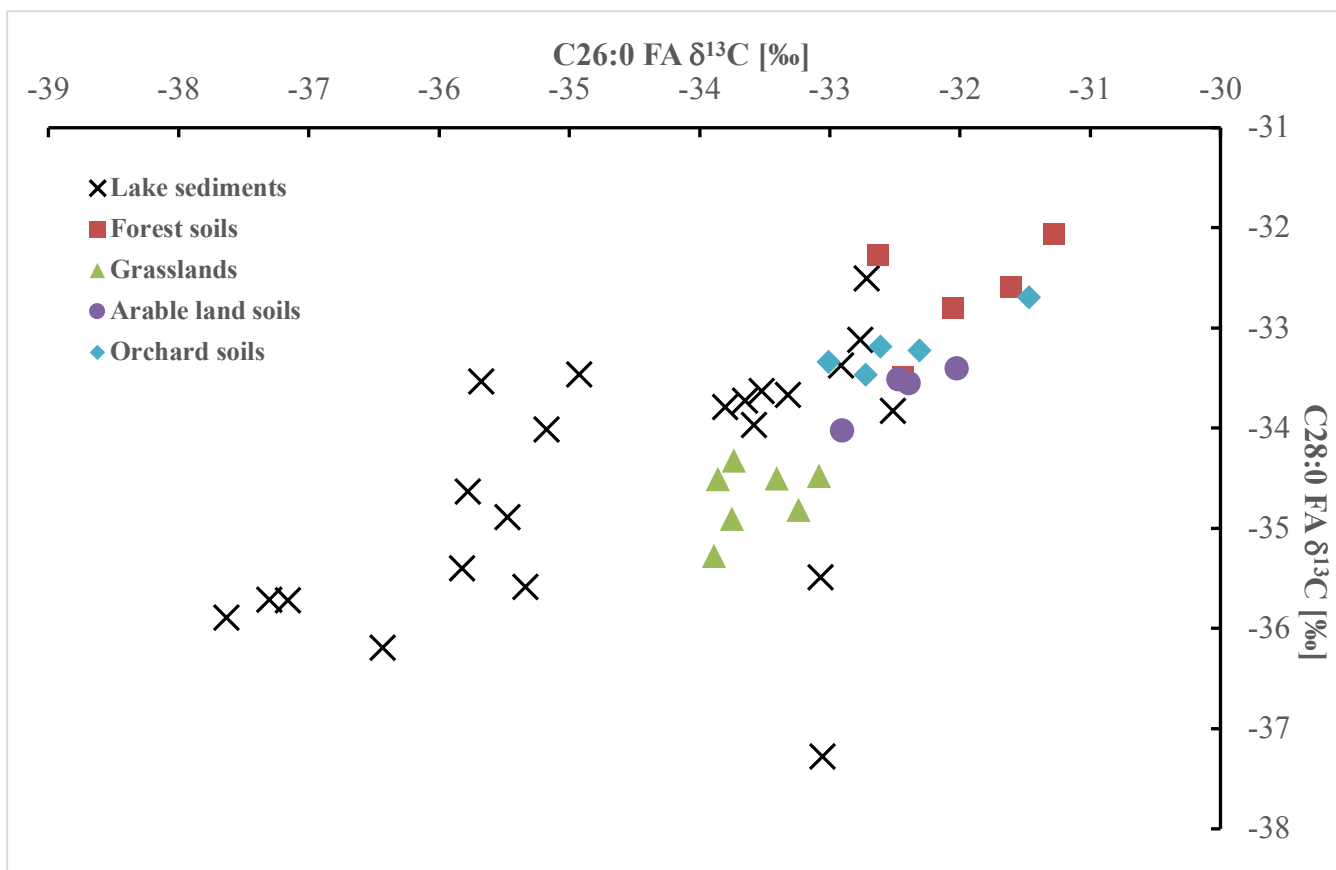

Fig. S5: “Suess effect” corrected sediments and soils (back to 1840) for 10y turnover time of FAs in soils, after Verburg (2007).

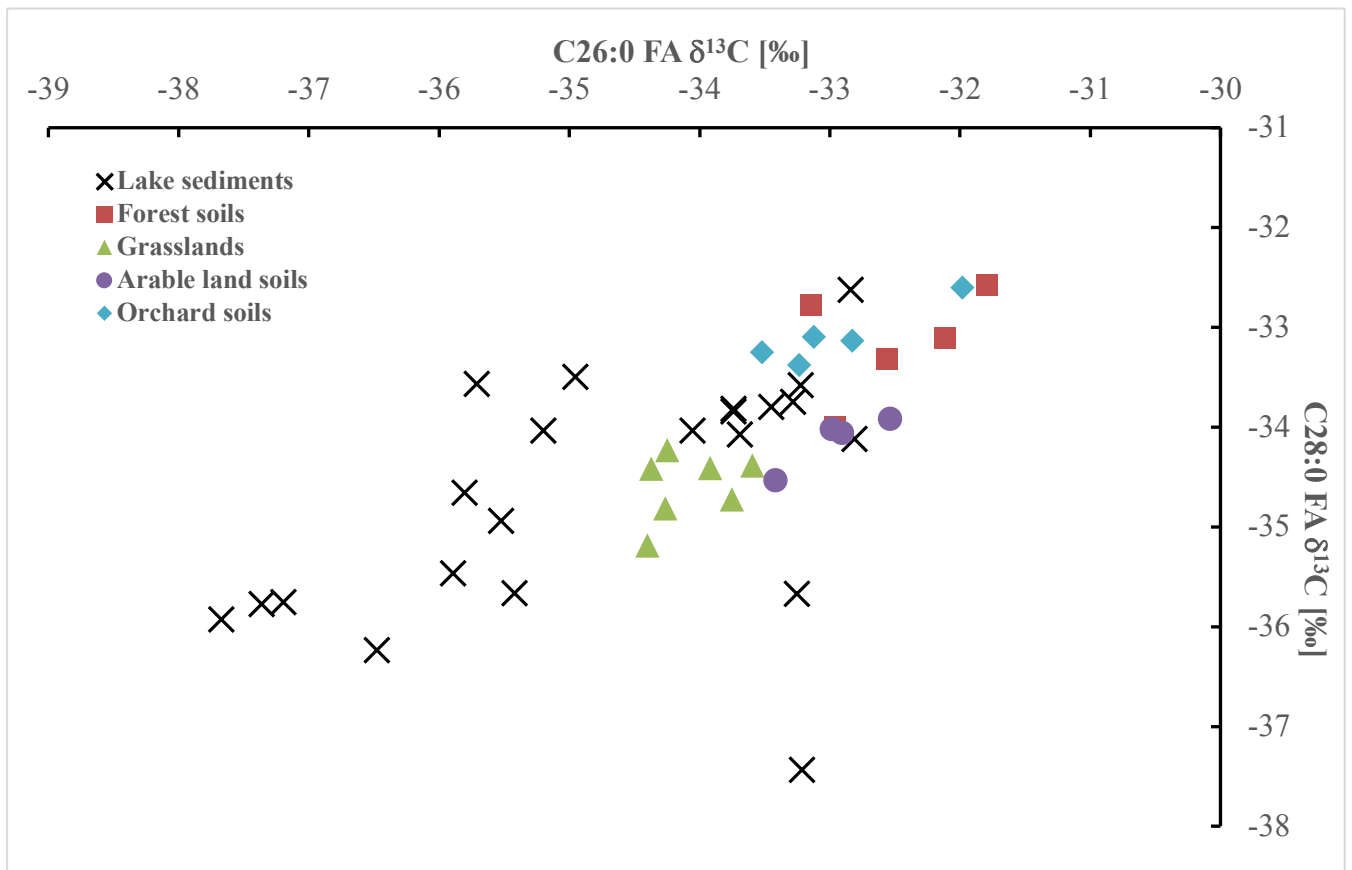

Fig. S6: “Suess effect” corrected sediments and soils (back to 1840) for 30y turnover time of FAs in soils, after Verburg (2007).

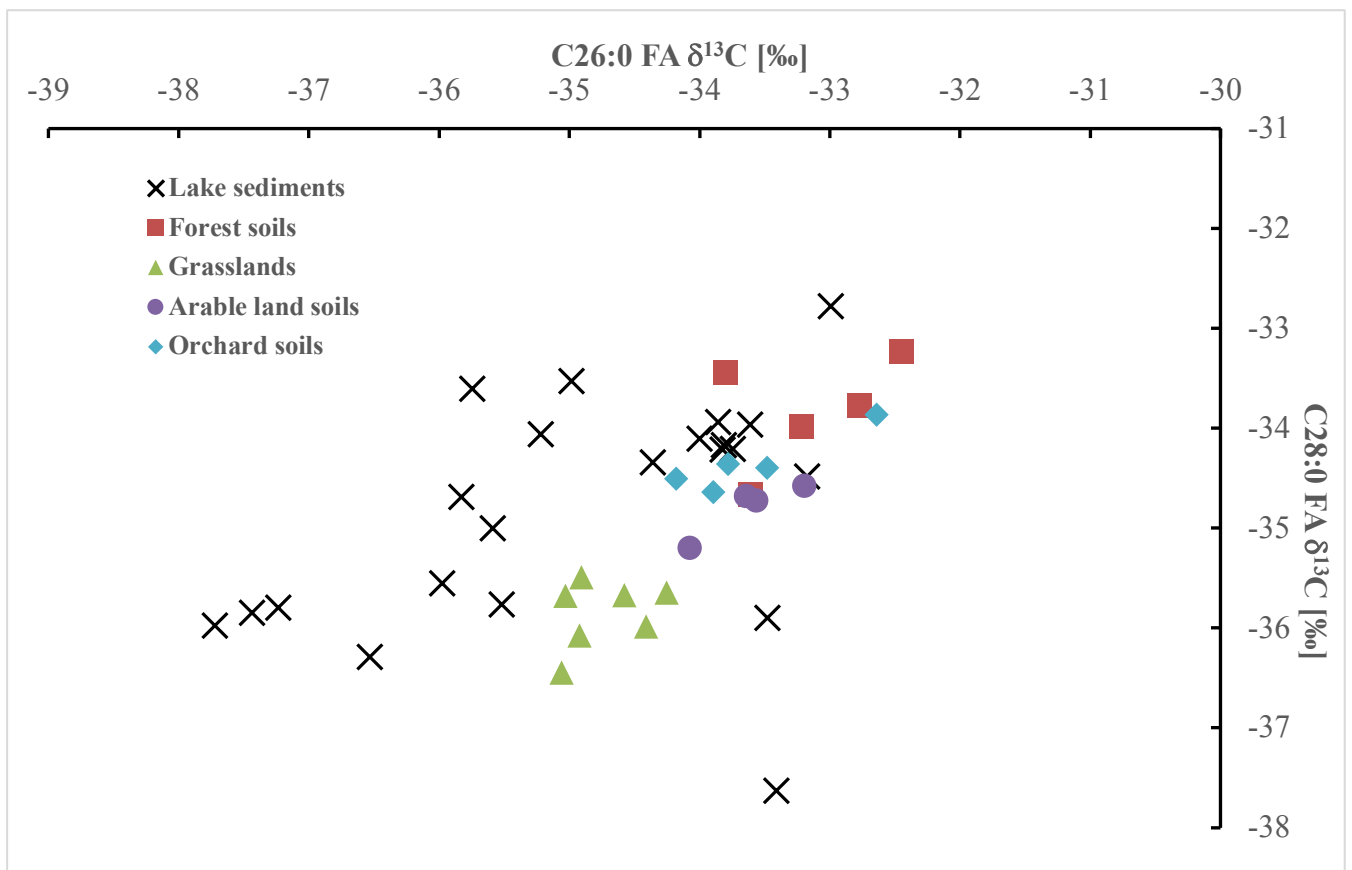

Fig. S7: “Suess effect” corrected sediments and soils (back to 1840) for 100y turnover time of FAs in soils, after Verburg (2007).
